# Supplementary material
Source: PubMed Central journal article supplement (PMC7535803)
Supplement: mmc1.pdf [file mmc1.pdf]

**Matter, Volume 3**

**Supplemental Information**

**SARS-CoV-2 RapidPlex: A Graphene-Based  
Multiplexed Telemedicine Platform for Rapid  
and Low-Cost COVID-19 Diagnosis and Monitoring**

**Rebeca M. Torrente-Rodríguez, Heather Lukas, Jiaobing Tu, Jihong Min, Yiran Yang, Changhao Xu, Harry B. Rossiter, and Wei Gao**

**Matter, Volume 3**

**Supplemental Information**

**SARS-CoV-2 RapidPlex: A Graphene-Based  
Multiplexed Telemedicine Platform for Rapid  
and Low-Cost COVID-19 Diagnosis and Monitoring**

**Rebeca M. Torrente-Rodríguez, Heather Lukas, Jiaobing Tu, Jihong Min, Yiran Yang, Changhao Xu, Harry B. Rossiter, and Wei Gao**

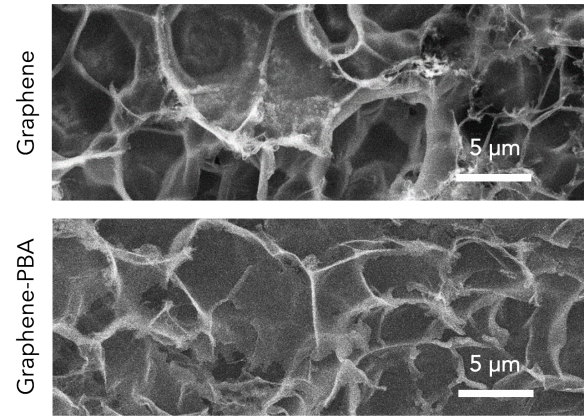

**Figure S1.** SEM images of the bare graphene electrode before and after modification with PBA.

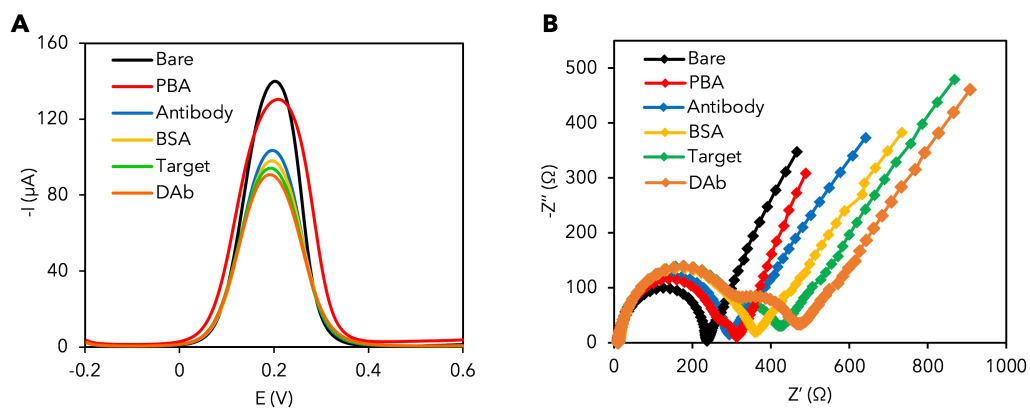

**Figure S2.** Electrochemical characterization of the sandwich assay-based graphene sensor modifications. Differential pulse voltammetry (DPV) (A) and Nyquist plots (B) of a graphene electrode in 0.01 M phosphate-buffered saline (PBS, pH 7.4) containing 2.0 mM of  $K_4Fe(CN)_6/K_3Fe(CN)_6$  (1:1) after each modification step (CRP assay as a representative example): bare graphene (Bare), functionalization with PBA (PBA), immobilization of antibody (Antibody), blocking with BSA (BSA), recognition of CRP (Target), and incubation with enzyme-tagged anti-CRP antibody (DAb).

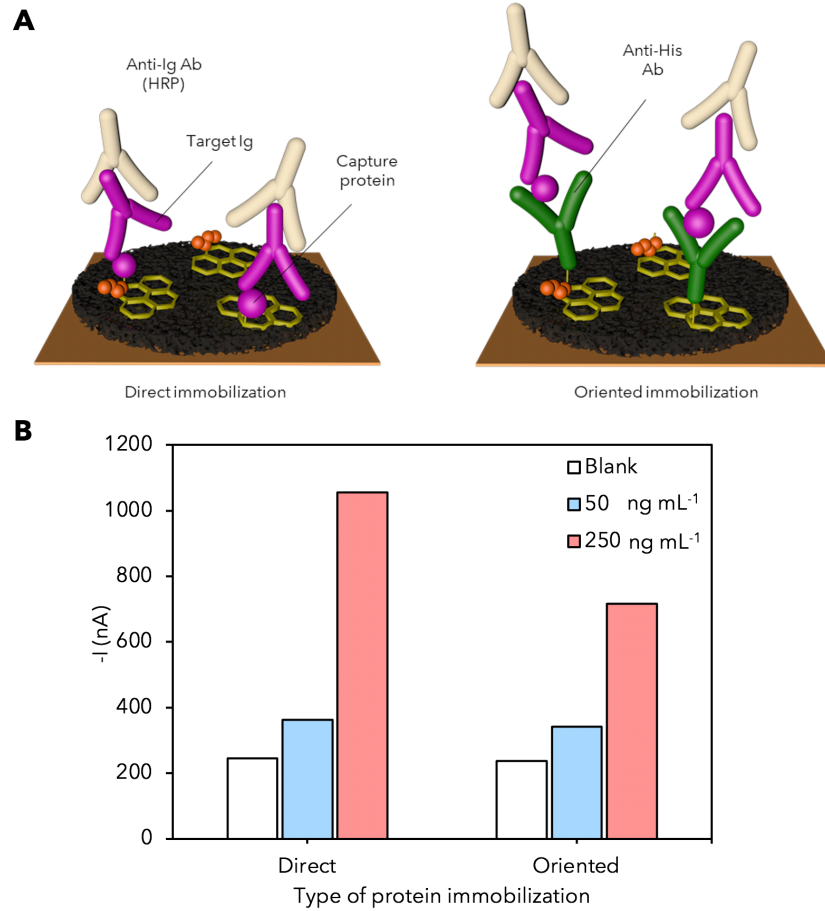

**Figure S3.** Characterization of the direct and oriented protein immobilization. Schemes illustrating direct and oriented immobilization of SARS-CoV-2 antigenic protein for detection of specific IgG or IgM isotypes (A), and comparison of sensor performance for S1-IgG detection using both types of immobilizations (B).

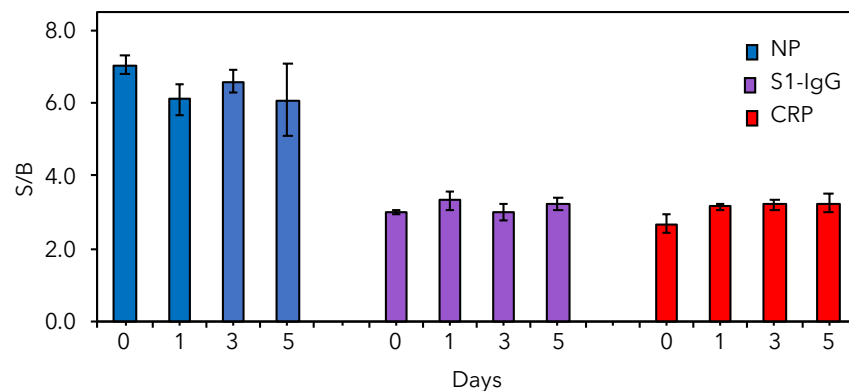

**Figure S4.** Stability evaluation of the LGE electrochemical biosensors. Variation of signal (S)-to-Blank (B) ratios over days of storage (at 4C in 1X PBS buffered solution) for NP, S1-IgG, and CRP sensors in the presence of  $500 \text{ pg mL}^{-1}$  NP,  $250 \text{ ng mL}^{-1}$  S1-IgG, and  $20 \text{ ng mL}^{-1}$  CRP, respectively. Data are represented as mean  $\pm$  SD ( $n = 3$ ).

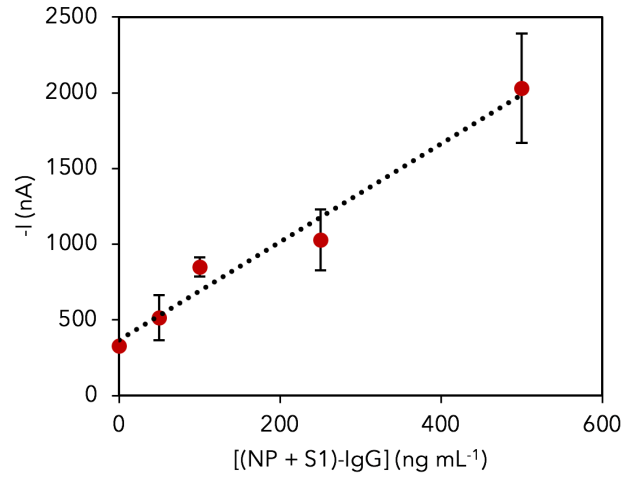

**Figure S5.** Calibration curve constructed for (NP + S1)-IgG detection in phosphate-buffered saline (PBS, pH 7.4) supplemented with 1.0% BSA. Data are presented as mean  $\pm$  SD ( $n = 3$ ).

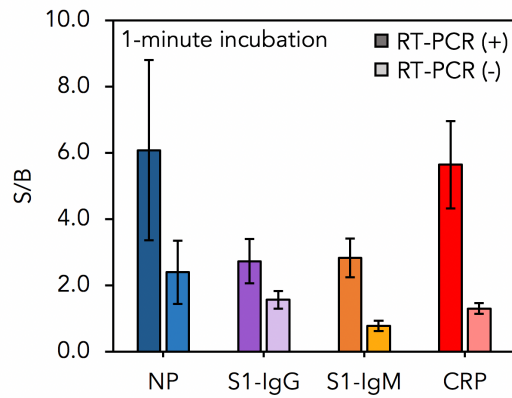

**Figure S6.** The signal (S)-to-blank (B) ratio of the LEG sensors obtained after 1-minute incubation with a 100X diluted serum sample from a COVID-19 positive patient (dark color) vs. a 100X diluted serum sample from a COVID-19 negative patient (light color). Data are represented as mean  $\pm$  SD (n = 4).



**Table S1.** Patient sample summary information.

| Sample Type | Sample ID | PCR Results | IgM/IgG Serology Results | Symptom Severity |
|-------------|-----------|-------------|--------------------------|------------------|
| Serum       | PSer428   | +           | (+)/(+)                  | Moderate         |
|             | PSer499   | +           | (+)/(+)                  | Mild             |
|             | PSer565   | +           | (+)/(+)                  | Moderate         |
|             | PSer458   | +           | (+)/(+)                  | Mild             |
|             | PSer560   | +           | (+)/(+)                  | Hospitalized     |
|             | PSer454   | +           | (-)/(+)                  | Asymptomatic     |
|             | PSer619   | +           | (-)/(+)                  | Asymptomatic     |
|             | PSer494   | +           | (-)/(+)                  | Mild             |
|             | PSer379   | +           | (-)/(+)                  | Mild             |
|             | PSer400   | +           | (-)/(+)                  | Mild             |
|             | NSer4     | -           | (-)/(-)                  | n/a              |
|             | NSer5     | -           | (-)/(-)                  | n/a              |
|             | NSer6     | -           | (-)/(-)                  | n/a              |
|             | NSer7     | -           | (-)/(-)                  | n/a              |
|             | NSer8     | -           | (-)/(-)                  | n/a              |
|             | NSer9     | -           | (-)/(-)                  | n/a              |
|             | NSer10    | -           | (-)/(-)                  | n/a              |
| Saliva      | PSal530   | +           | (-)/(+)                  | Mild             |
|             | PSal664   | +           | (-)/(+)                  | Asymptomatic     |
|             | PSal675   | +           | (-)/(+)                  | Asymptomatic     |
|             | PSal658   | +           | (-)/(+)                  | Asymptomatic     |
|             | PSal604   | +           | (+)/(+)                  | Asymptomatic     |
|             | NSal3     | -           | (-)/(-)                  | n/a              |
|             | NSal4     | -           | (-)/(-)                  | n/a              |
|             | NSal5     | -           | (-)/(-)                  | n/a              |
